# Supplementary material for: Self-filling microwell arrays (SFMAs) for tumor spheroid formation
Source: Royal Society of Chemistry journal article supplement (doi:10.1039/c8lc00708j), 2018-01-01
Supplement: c8lc00708j1.pdf [file c8lc00708j1.pdf]

### Supplementary Information

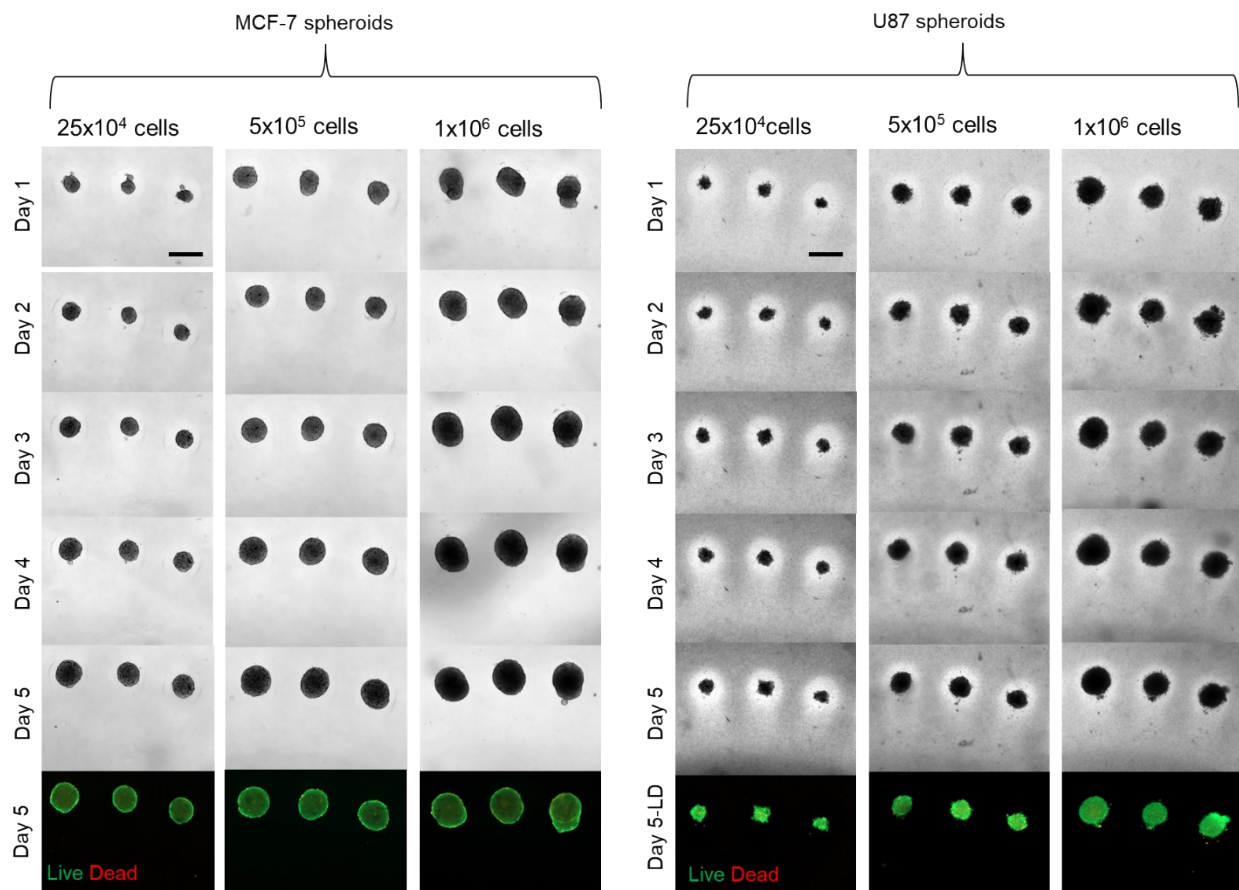

**Figure S1.** Formation of homogenous cell spheroids in SFMAs using MCF-7 and U87 cells. Scale bar shows 500  $\mu\text{m}$ .
